# Supplementary material for: Highly efficient adsorbent design using a Cu-BTC/CuO/carbon fiber paper composite for high CH4/N2 selectivity
Source: Royal Society of Chemistry journal article supplement (doi:10.1039/c6ra28124a), 2017-01-01
Supplement: c6ra28124a1.pdf [file c6ra28124a1.pdf]

## High efficient adsorbent design using Cu–BTC/CuO/Carbon fiber paper composite for CH<sub>4</sub>/N<sub>2</sub> high selectivity

Zhi-Guo Qu<sup>a\*</sup>, Hui Wang<sup>a</sup>, Wen Zhang<sup>b\*</sup>

<sup>a</sup> MOE Key Laboratory of Thermo-Fluid Science and Engineering, School of Energy and Power Engineering, Xi'an Jiaotong University, Xi'an, Shaanxi 710049, China

<sup>b</sup> School of Science, Xi'an Jiaotong University, Xi'an, Shaanxi 710049, China

\* Corresponding author. Tel/Fax: +86-029-82668543; E-mail address: zgqu@mail.xjtu.edu.cn; zhangwen@mail.xjtu.edu.cn

### Material characterization

The SEM images of samples obtained at different synthesis times (3, 9, 18, and 24 h) are shown in Fig. S1. The pictures on the left show Cu–BTC (3, 9, 18, and 24 h) growing on carbon fiber, whereas the pictures on the right show Cu–BTC (3, 9, 18, and 24 h) grown on carbon sheet. The Cu–BTC crystal and CuO coating on the carbon fiber paper (CFP) are shown in Fig. S2 (a) and (b), respectively.

The adsorption isotherms of the gases (N<sub>2</sub> and CH<sub>4</sub>) are measured using an automatic gas sorption analyzer (Quantachrome Autosorb IQ, USA). In the analysis, the samples were pretreated at 393.15 K under vacuum for 16 h to remove any physically adsorbed gases from the surface. N<sub>2</sub> is then used to measure the adsorption and desorption on samples at different relative pressures and at 77 K temperature to test the surface area and pore diameter distribution. Pore size distribution is estimated from nitrogen data by using a no-local density functional theory (NLDFT). The other gases (N<sub>2</sub> and CH<sub>4</sub>) are used to measure the adsorption at different pressure and temperature (273.15 K) in an ice-water bath. The results of N<sub>2</sub> adsorption–desorption isotherms and the pore distribution are shown in Fig. S3 and Fig. S4, respectively. Fig. S5 shows the SEM of different concentrations of Cu–BTC and CuO on CFP. The dual-site Langmuir–Freundlich (DSLFL) model is expressed as:

$$q = q_{m,1} \frac{b_1 p^{1/n_1}}{1 + b_1 p^{1/n_1}} + q_{m,2} \frac{b_2 p^{1/n_2}}{1 + b_2 p^{1/n_2}} \quad (1)$$

where  $q_{m,1}$  and  $q_{m,2}$  are the saturation capacities of the sites 1 and 2 (mol/kg) in the DSLFL model, respectively;  $b_1$  and  $b_2$  are the affinity coefficients of sites 1 and 2 (1/kPa) in the DSLFL model,

respectively;  $n_1$  and  $n_2$  are the corresponding deviations from an ideal homogeneous surface. The fitted parameters are shown in Table S1.

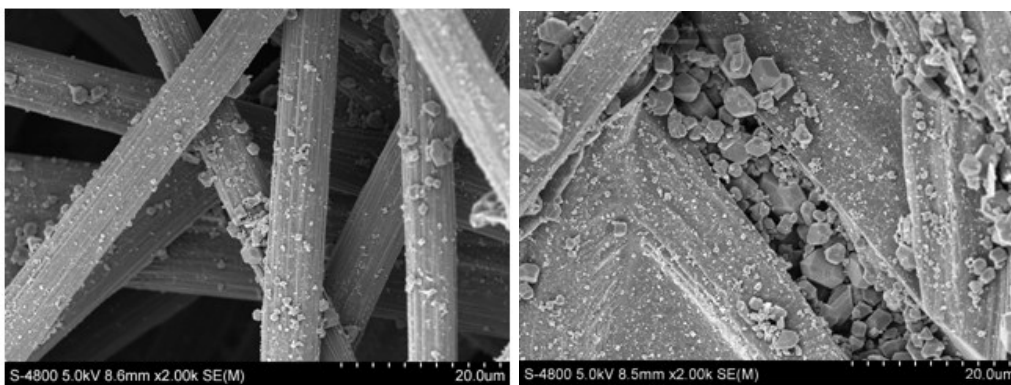

(a) Cu-BTC/CFP (3 h)

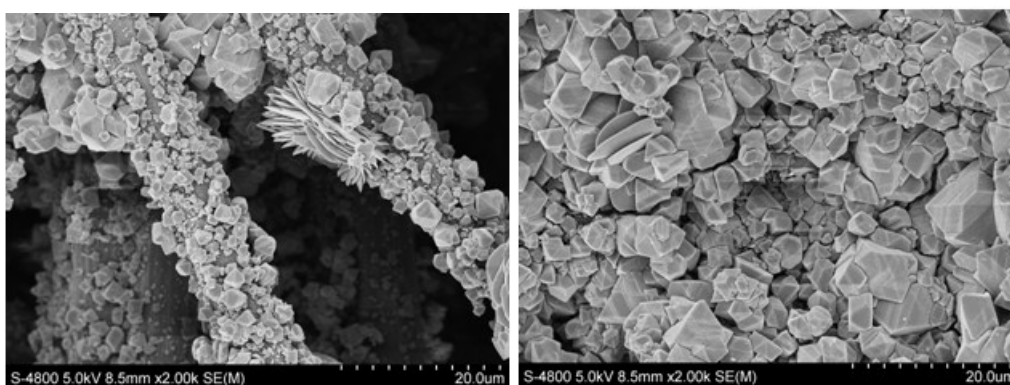

(b) Cu-BTC/CFP (9 h)

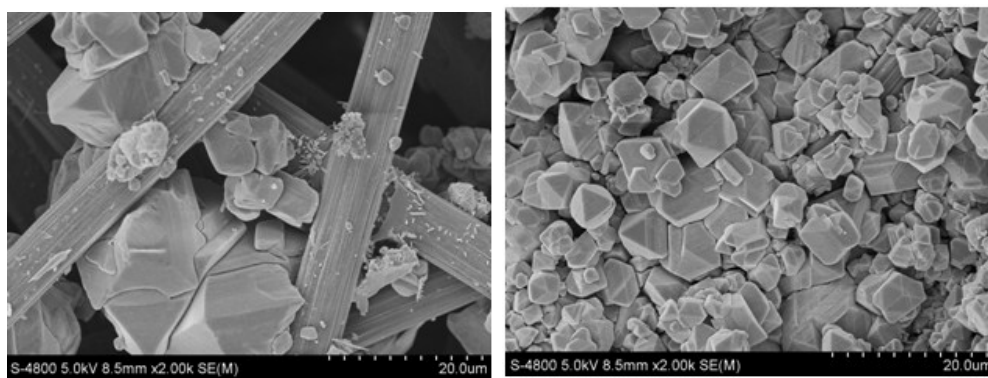

(c) Cu-BTC/CFP (18h)

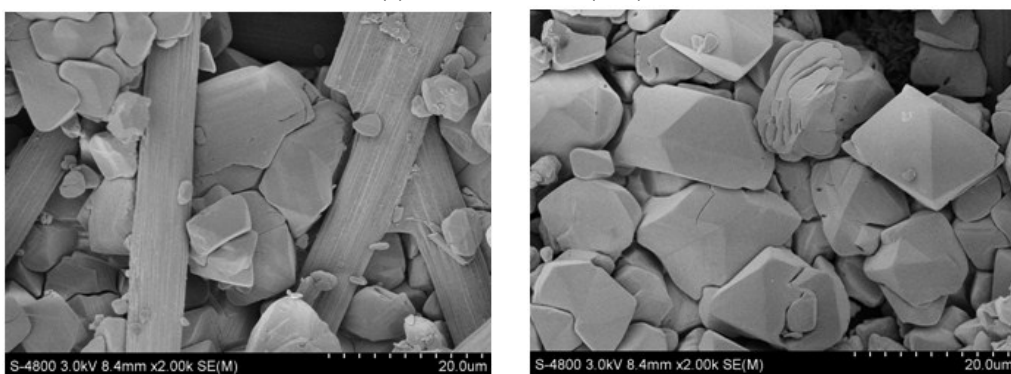

(d) Cu-BTC/CFP (24 h)

Fig. S1 SEM image of different samples.

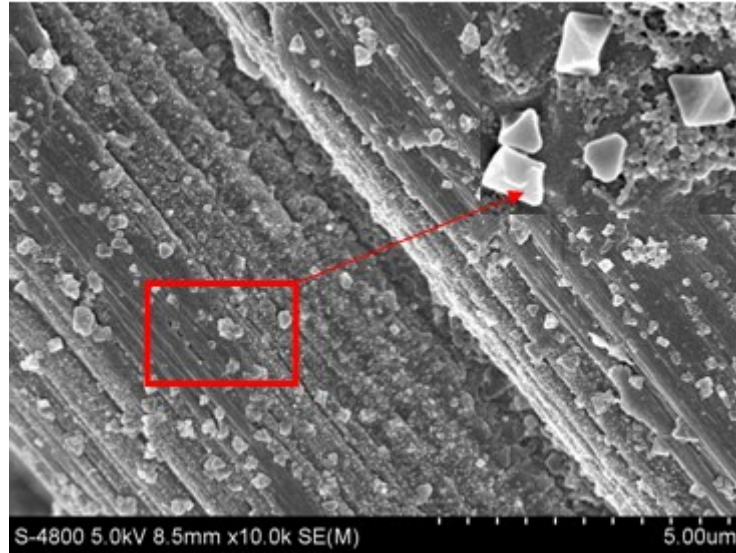

(a) The seeds coating on CFP

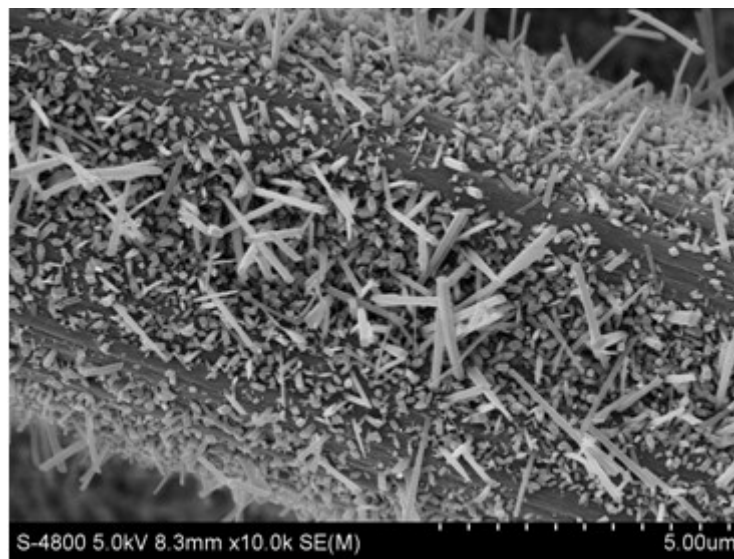

(b) CuO coating on CFP

Fig. S2 The SEM of Cu-BTC crystal and CuO coating on CFP.

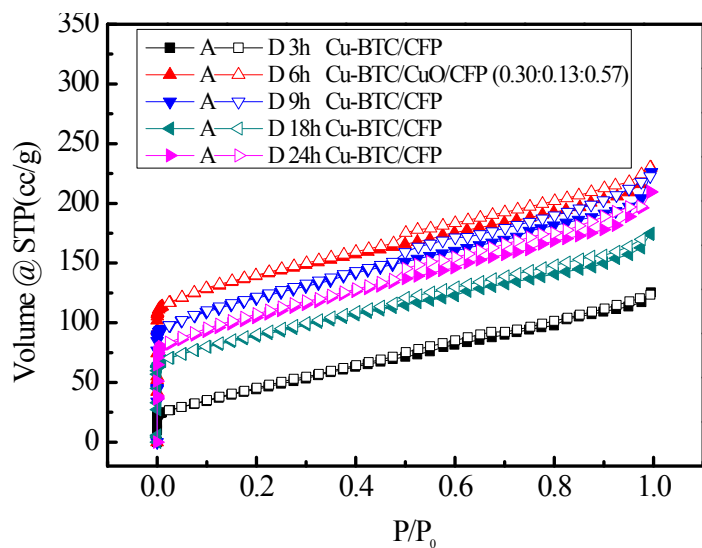

(a)  $N_2$  adsorption isotherm at 77 K

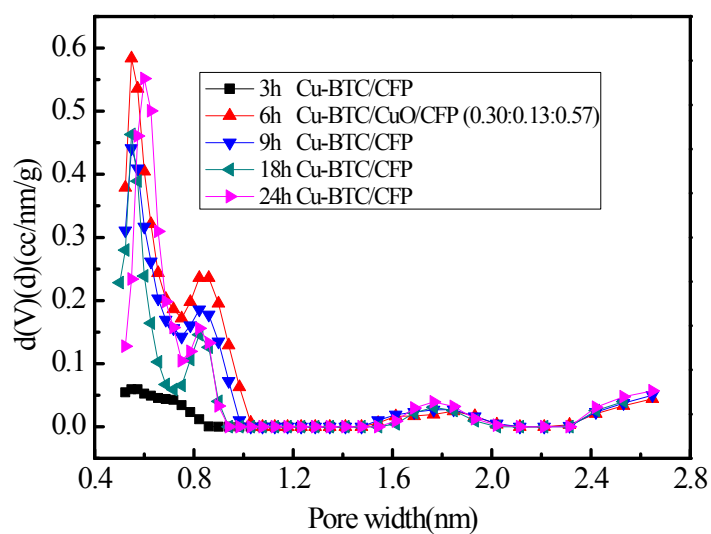

(b) Pore width distribution calculated by NLDFT

Fig. S3 Adsorption isotherm of  $N_2$  and pore distribution.

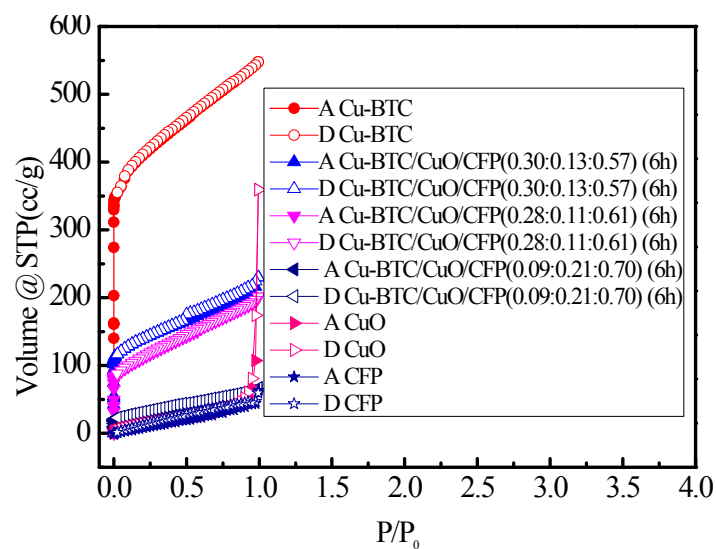

(a) N<sub>2</sub> adsorption isotherm at 77 K

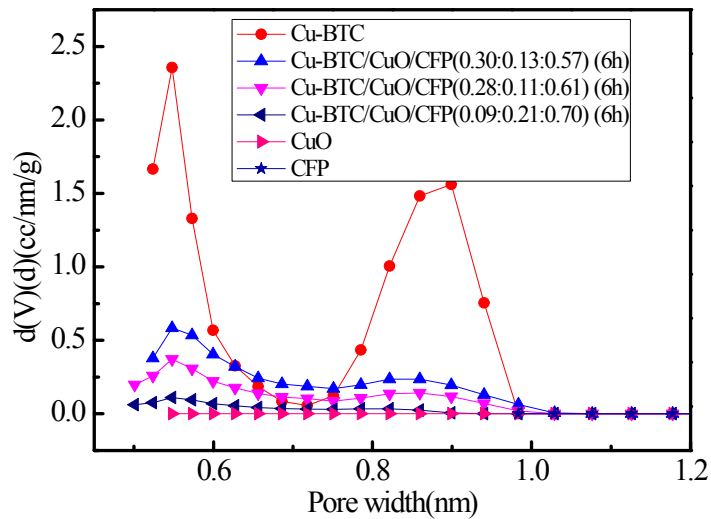

(b) Pore width distribution calculated by NLDFT

Fig. S4 Adsorption isotherm of N<sub>2</sub> and pore distribution.

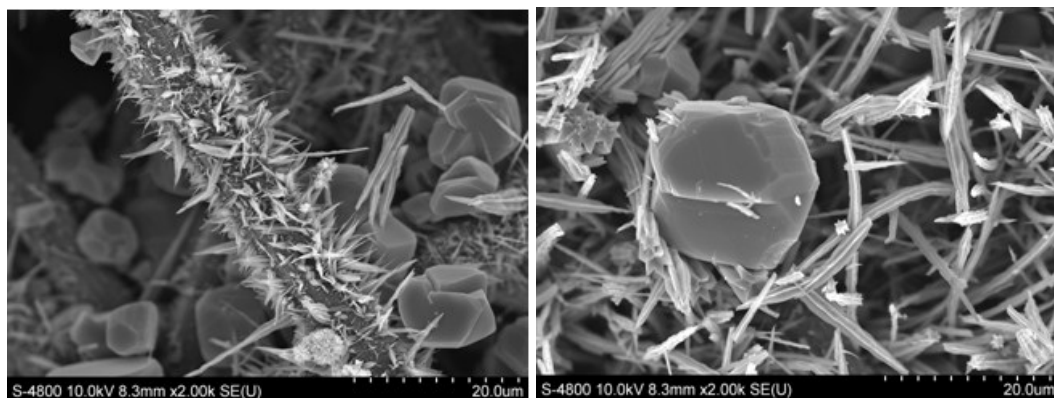

(a) Cu-BTC/CuO/CFP (0.09:0.21:0.70) (6h)

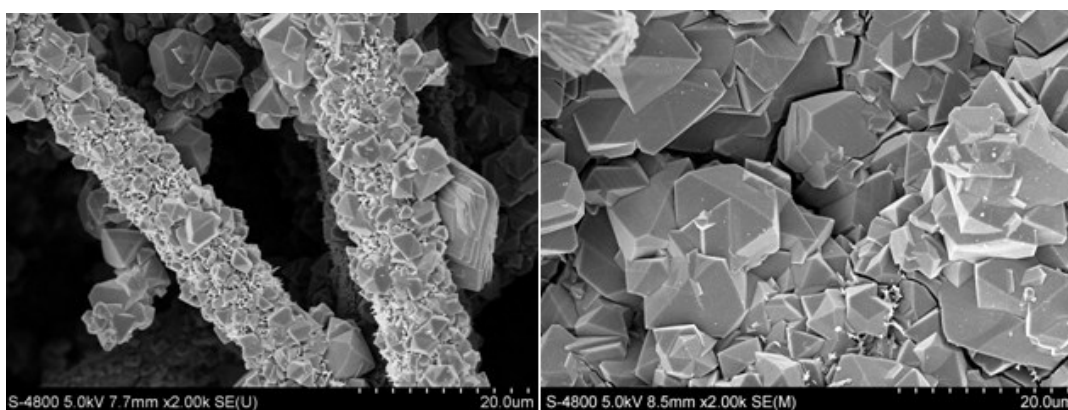

(b) Cu-BTC/CuO/CFP (0.30:0.13:0.57) (6h)

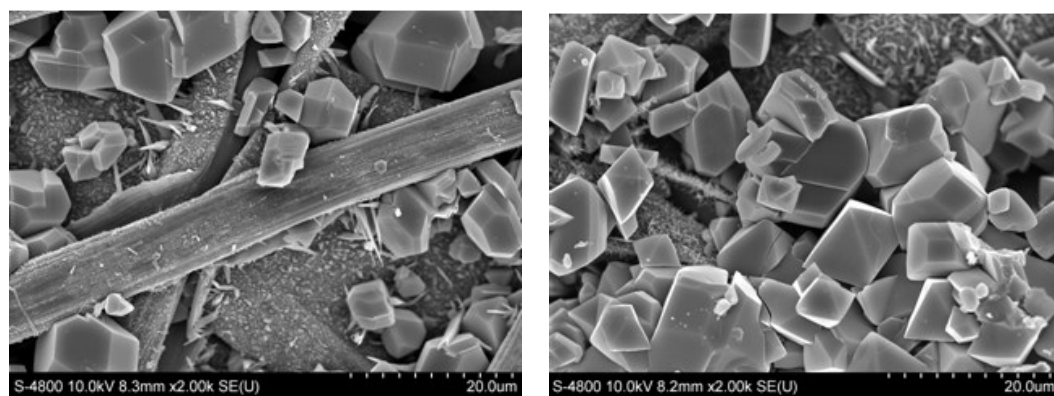

(c) Cu-BTC/CuO/CFP (0.28:0.11:0.61) (6h)

Fig. S5 The SEM of different concentrations of Cu-BTC and CuO on CFP.

Table S1 Summary of equation parameters for the DSLF model

| Adsorbate                          | Conditions                    | $q_{m,1}$             | $q_{m,2}$             | $b_1$                  | $b_2$                 | $n_1$                 | $n_2$                 | $R^2$                |
|------------------------------------|-------------------------------|-----------------------|-----------------------|------------------------|-----------------------|-----------------------|-----------------------|----------------------|
| N <sub>2</sub>                     | Cu-BTC/CP (3h)                | $2.35 \times 10^{-1}$ | $1.69 \times 10^{-2}$ | $1.3810^{-4}$          | $1.81 \times 10^{-4}$ | $5.47 \times 10^{-1}$ | $3.68 \times 10^{-1}$ | 1.00                 |
|                                    | Cu-BTC/CP (9h)                | 1.23                  | $1.84 \times 10^{-2}$ | $4.89 \times 10^{-4}$  | $7.36 \times 10^{-3}$ | $8.31 \times 10^{-1}$ | $6.22 \times 10^{-1}$ | 1.00                 |
|                                    | Cu-BTC/CP (18h)               | $4.05 \times 10^{-1}$ | $1.65 \times 10^{-3}$ | $1.39 \times 10^{-3}$  | $8.51 \times 10^{-1}$ | $8.33 \times 10^{-1}$ | $1.5 \times 10^{-1}$  | 1.00                 |
|                                    | Cu-BTC/CP (24h)               | $8.39 \times 10^{-1}$ | $2.68 \times 10^{-3}$ | $1.44 \times 10^{-4}$  | $2.15 \times 10^{-2}$ | $6.54 \times 10^{-1}$ | $6.13 \times 10^{-1}$ | 1.00                 |
|                                    | Carbon fiber                  | $4.91 \times 10^{-2}$ | $4.91 \times 10^{-2}$ | $2.14 \times 10^{-3}$  | $2.14 \times 10^{-3}$ | $8.90 \times 10^{-1}$ | $8.90 \times 10^{-1}$ | 1.00                 |
|                                    | Cu-BTC/CuO/CP(0.30:0.13:0.57) | $6.00 \times 10^{-1}$ | $1.47 \times 10^{-2}$ | $7.97 \times 10^{-4}$  | $9.94 \times 10^{-2}$ | $7.44 \times 10^{-1}$ | $9.41 \times 10^{-1}$ | 1.00                 |
|                                    | Cu-BTC/CuO/CP(0.28:0.11:0.61) | $5.01 \times 10^{-1}$ | $1.00 \times 10^{-5}$ | $1.04 \times 10^{-3}$  | $7.06 \times 10^{-2}$ | $7.67 \times 10^{-1}$ | $6.70 \times 10^{-1}$ | 1.00                 |
|                                    | Cu-BTC/CuO/CP(0.09:0.21:0.70) | $1.24 \times 10^{-1}$ | $1.28 \times 10^{-2}$ | $4.26 \times 10^{-4}$  | $2.26 \times 10^{-2}$ | $6.51 \times 10^{-1}$ | $8.30 \times 10^{-1}$ | 1.00                 |
|                                    | Cu-BTC                        | 4.02                  | $3.54 \times 10^{-4}$ | $1.07 \times 10^{-3}$  | $3.06 \times 10^{-2}$ | $9.46 \times 10^{-1}$ | 1.00                  | 1.00                 |
|                                    | CH <sub>4</sub>               | Cu-BTC/CP (3h)        | $1.79 \times 10^{-1}$ | $6.40 \times 10^{-4}$  | $9.13 \times 10^{-3}$ | $8.51 \times 10^{-1}$ | $9.06 \times 10^{-1}$ | $1.5 \times 10^{-1}$ |
| Cu-BTC/CP (9h)                     |                               | $8.49 \times 10^{-1}$ | $1.47 \times 10^{-2}$ | $5.88 \times 10^{-3}$  | $7.98 \times 10^{-1}$ | $9.46 \times 10^{-1}$ | $1.49 \times 10^{-1}$ | 1.00                 |
| Cu-BTC/CP (18h)                    |                               | $8.15 \times 10^{-1}$ | $2.05 \times 10^{-2}$ | $3.60 \times 10^{-3}$  | $8.51 \times 10^{-1}$ | $8.77 \times 10^{-1}$ | $1.5 \times 10^{-1}$  | 1.00                 |
| Cu-BTC/CP (24h)                    |                               | $6.14 \times 10^{-1}$ | $1.16 \times 10^{-2}$ | $7.09 \times 10^{-3}$  | $8.51 \times 10^{-1}$ | $9.23 \times 10^{-1}$ | $1.5 \times 10^{-1}$  | 1.00                 |
| Carbon fiber                       |                               | $5.08 \times 10^{-2}$ | $5.14 \times 10^{-2}$ | $1.25 \times 10^{-3}$  | $1.30 \times 10^{-3}$ | $8.49 \times 10^{-1}$ | $8.49 \times 10^{-1}$ | 1.00                 |
| Cu-BTC/CuO/CP(0.30:0.13:0.57) (6h) |                               | 3.53                  | 1.95                  | $1.323 \times 10^{-3}$ | $6.62 \times 10^{-3}$ | $9.00 \times 10^{-1}$ | 1.36                  | 0.999                |
| Cu-BTC/CuO/CP(0.28:0.11:0.61) (6h) |                               | 1.886                 | $2.17 \times 10^{-4}$ | $2.23 \times 10^{-3}$  | $2.54 \times 10^{-2}$ | $9.68 \times 10^{-1}$ | $8.22 \times 10^{-1}$ | 1.00                 |
| Cu-BTC/CuO/CP(0.09:0.21:0.70) (6h) |                               | $2.11 \times 10^{-1}$ | $1.99 \times 10^{-2}$ | $1.66 \times 10^{-3}$  | $5.58 \times 10^{-2}$ | $6.87 \times 10^{-1}$ | $8.71 \times 10^{-1}$ | 1.00                 |
| Cu-BTC                             |                               | 4.60                  | 1.15                  | 2.754                  | $8.01 \times 10^{-3}$ | 1.00                  | 1.53                  | 0.999                |
